# Supplementary material for: Immunogenicity in Rabbits of HIV-1 SOSIP Trimers from Clades A, B, and C, Given Individually, Sequentially, or in Combination
Source: PubMed Central journal article supplement (PMC5874403; doi:10.1128/jvi.01957-17), 2018-03-28
Supplement: JVI.01957-17_zjv007183439s2.pdf [file JVI.01957-17_zjv007183439s2.pdf]

**Table S1. Midpoint neutralization titers ( $ID_{50}$ ) against a panel of Env pseudotyped viruses from rabbits immunized with clade A, clade B and clade C immunogens in monovalent, combination and sequential regimens.**

The TZM-bl assay was performed at the Academic Medical Center (AMC) or at the Duke University Medical Center (DUMC).  $ID_{50}$  values are shown and colored according to their magnitude.  $ID_{50} < 20$  in white;  $20 < ID_{50} < 40$  in grey;  $40 < ID_{50} < 100$  in yellow;  $100 < ID_{50} < 1000$  in orange and  $ID_{50} > 1000$  in red.
